# Supplementary material for: Mutations in the dimer interfaces of the dengue virus capsid protein affect structural stability and impair RNA-capsid interaction
Source: PubMed Central journal article supplement (PMC6391532; doi:10.1038/s41598-019-39185-3), 2019-02-26
Supplement: 41598_2019_39185_MOESM1_ESM.pdf [file 41598_2019_39185_MOESM1_ESM.pdf]

**Mutations in the dimer interfaces of the dengue virus capsid protein affect structural stability and impair RNA-capsid interaction**

Janaina Figueira-Mansur<sup>1</sup>, Estefania A. Aguilera<sup>1</sup>, Rafael M. Stoque<sup>1</sup>, Gustavo T. Ventura<sup>1</sup> and Ronaldo Mohana-Borges<sup>1\*</sup>.

<sup>1</sup>Laboratório de Genômica Estrutural, Instituto de Biofísica Carlos Chagas Filho, Universidade Federal do Rio de Janeiro, Rio de Janeiro, Brazil

\*Corresponding author

E-mail: Mohana@biof.ufrj.br

Telephone: +55-21-39386538

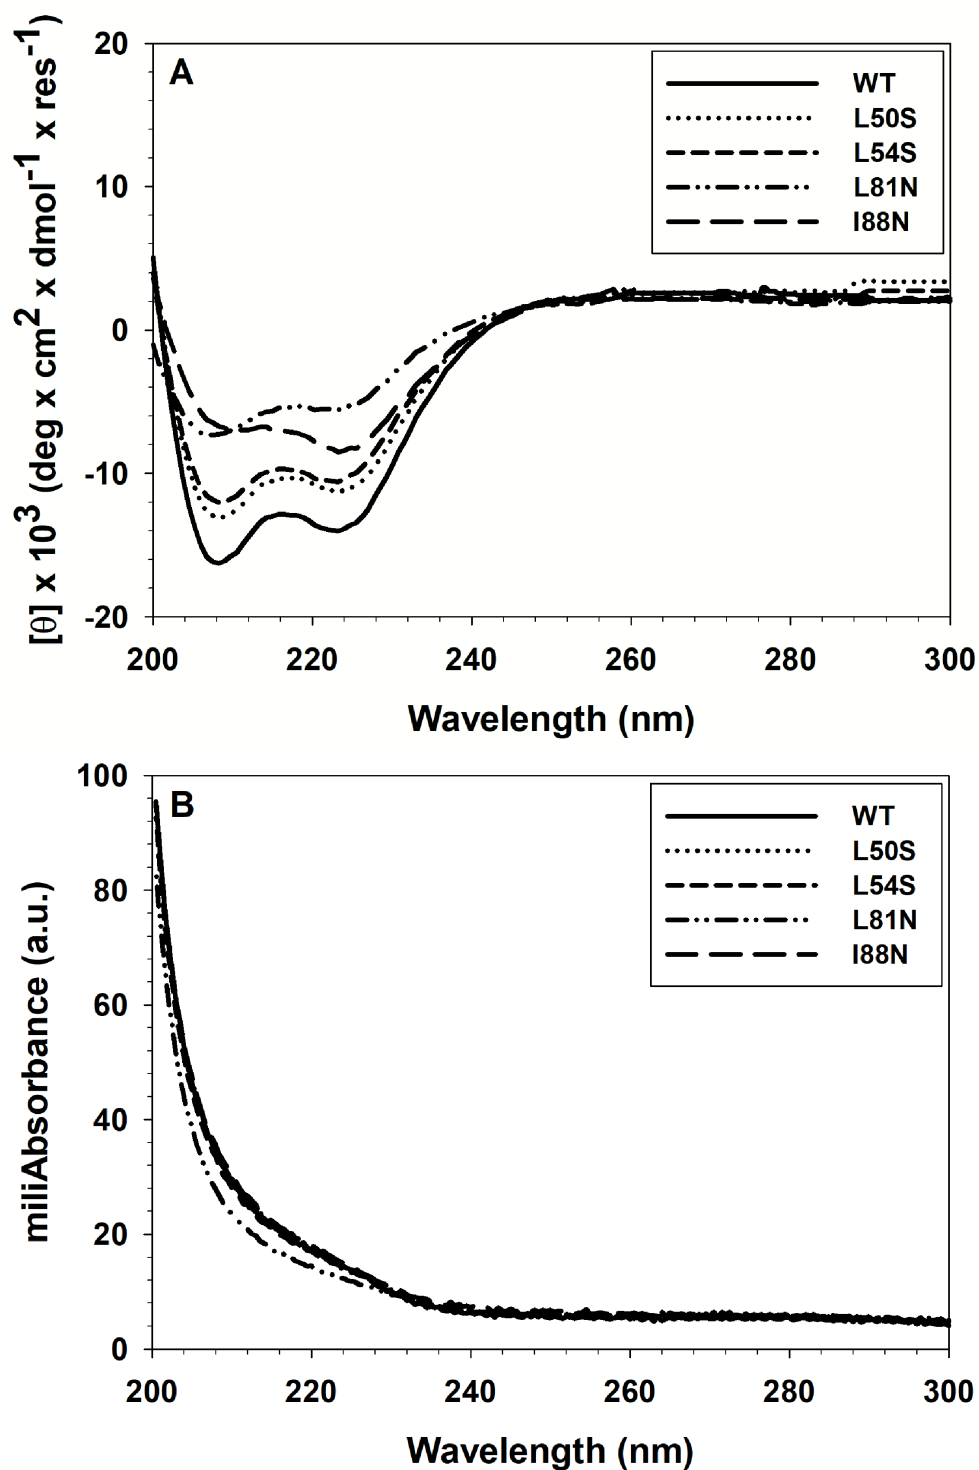

Supplementary Fig. S1 - Analysis of the secondary structure of WT and single-point mutant (L50S, L54S, L81N and I88N) DENV2C proteins by circular dichroism. (A) CD spectra were obtained in a Chirascan (Applied Photophysics, United Kingdom) using quartz cuvettes with a 0.01-cm path length at 25°C. The proteins were diluted in 50 mM sodium phosphate buffer (pH 6.0)/ 200 mM NaCl to a final concentration of 30  $\mu\text{M}$ . Final spectra were the averages of triplicates after buffer and baseline subtractions and were plotted from wavelengths of 200 nm to 300 nm. (B) Absorbance spectra of WT and single-point mutant (L50S, L54S, L81N and I88N) DENV2C proteins as the CD spectra were being collected.

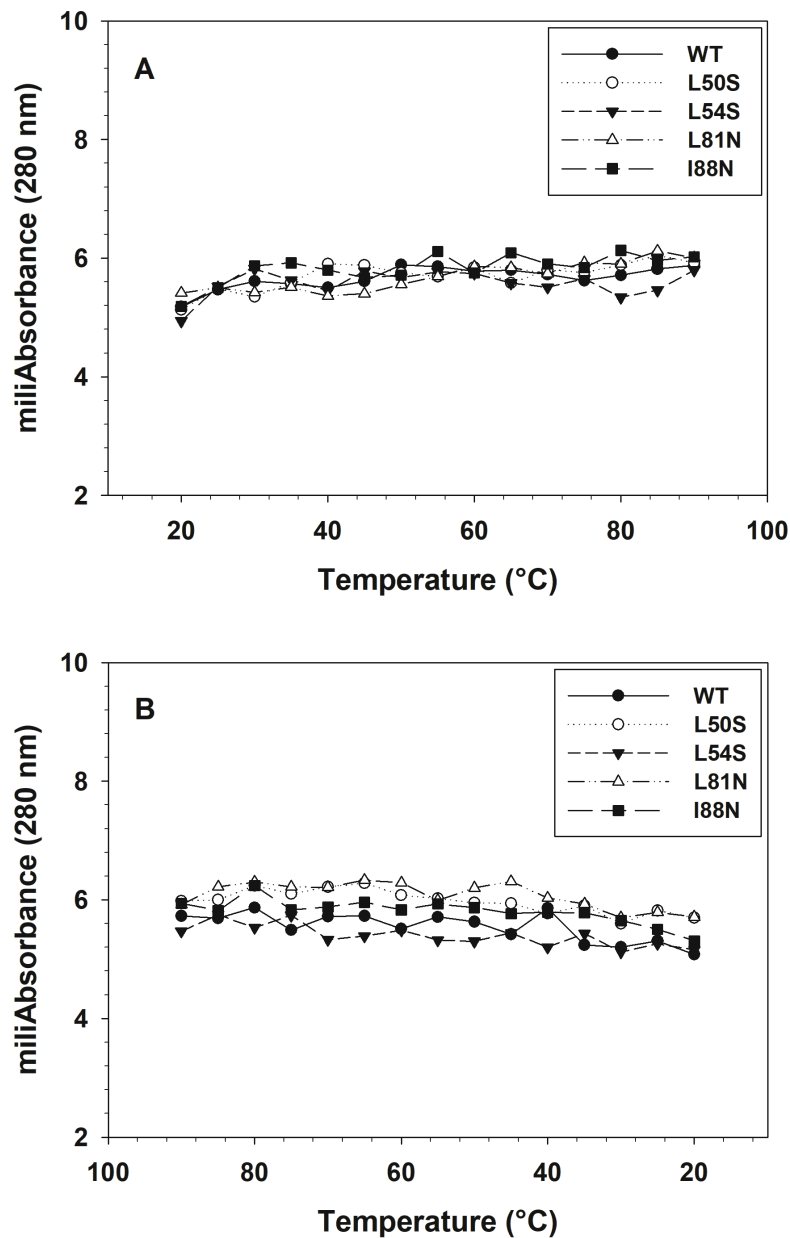

Supplementary Fig. S2 - Thermal denaturation of WT and mutant DENV2C proteins monitored by absorbance at 280 nm. Absorbance spectra were obtained in a Chirascan (Applied Photophysics, United Kingdom) using quartz cuvettes with 0.1-cm path lengths. The proteins were diluted in 50 mM sodium phosphate buffer (pH 6.0)/200 mM NaCl to a final concentration of 10  $\mu$ M. Spectra were collected every 2°C from 20 to 90°C (A), with one acquisition at each temperature and to evaluate the reversibility of denaturation, spectra were also collected every 2°C from 90 to 20°C (B). The Absorbance at 280 nm was used to evaluate potential protein aggregation/deposition promoted by temperature.
